# Supplementary material
Source: publisher figshare collection journal article supplement (https://springernature.figshare.com/ndownloader/files/14548385)

Additional file 1: **Figure S1** Phylogenetic tree of VIP1 gene from different species


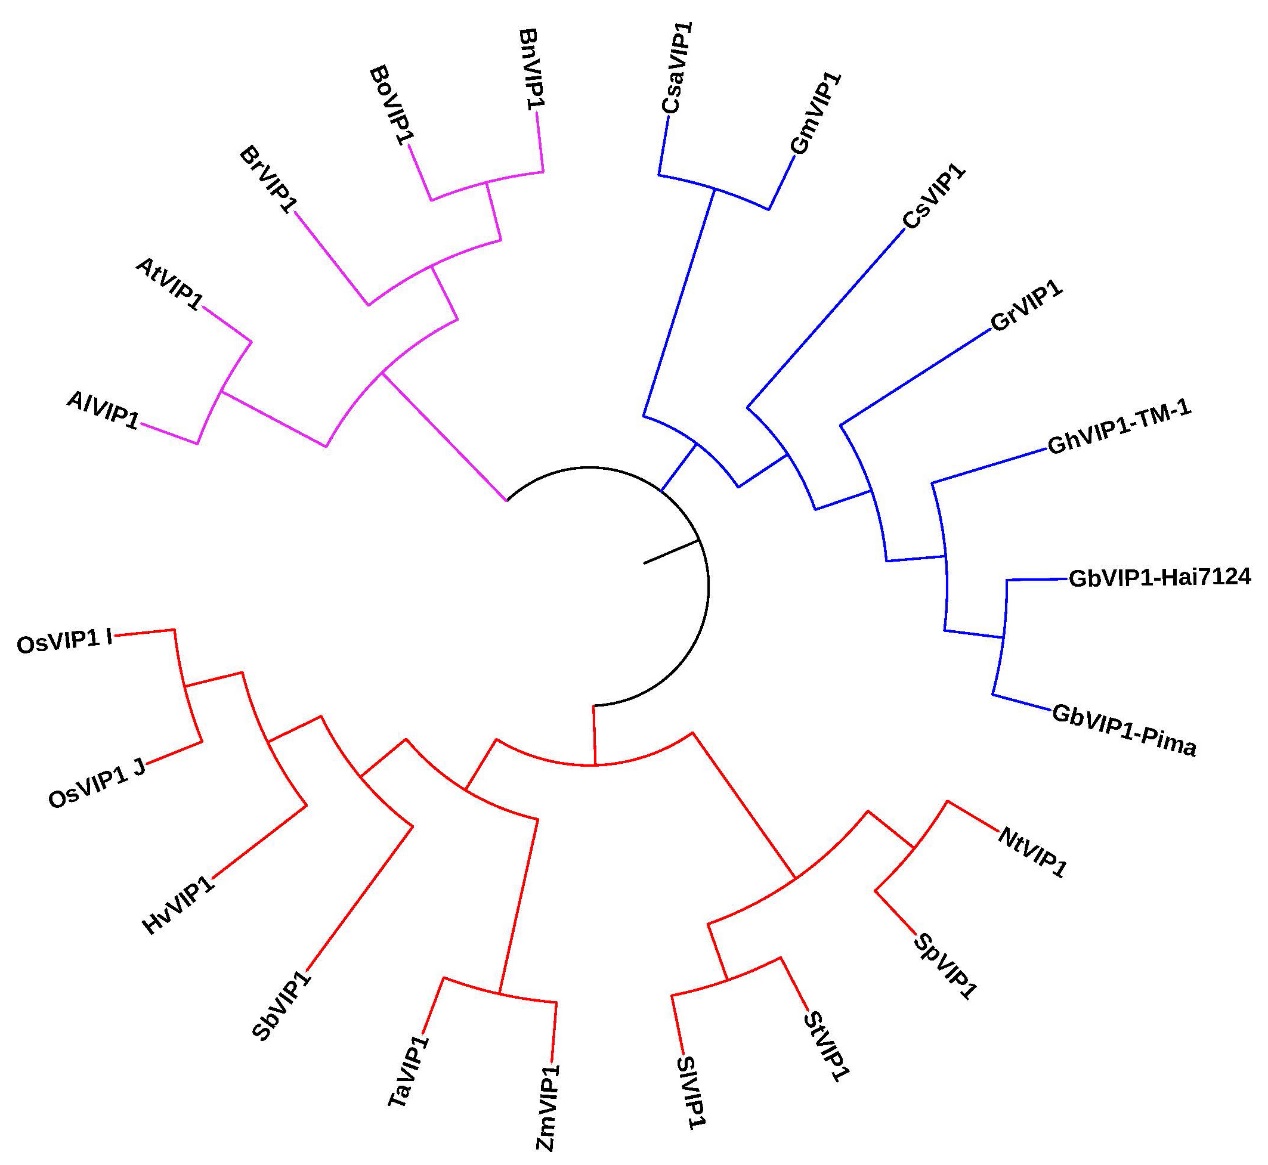

Supplement: Supplementary file 1 [file 14548385]
